# Supplementary material for: Lactate Conversion by Lactate Dehydrogenase B Is Involved in Beige Adipocyte Differentiation and Thermogenesis in Mice
Source: MDPI journal article supplement (doi:10.3390/nu15224846), 2023-11-20
Supplement: s1 [file s1]

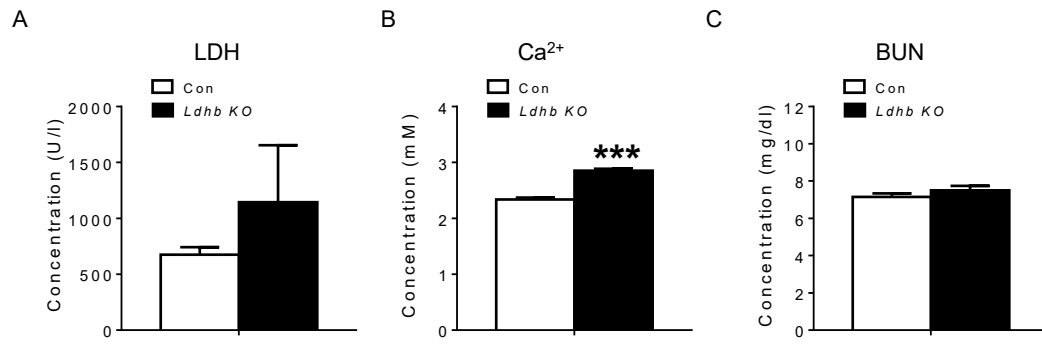

**Supplemental Figure S1.** Global knockout of *Ldhb* might disrupt global lactate metabolism and cardiac functions. (A–C) Serum levels LDH (A), calcium (B), and blood urea nitrogen (BUN, C) of *Ldhb* *tm1a*  $^{-/-}$  mice or control littermates (WT) ( $n = 3$  or  $12\text{--}15$  for *Ldhb* *tm1a*  $^{-/-}$  mice or WT respectively). \*\*\*  $p < 0.001$ .
